# Supplementary material
Source: publisher figshare collection journal article supplement (https://gsajournals.figshare.com/articles/dataset/_/8048756)
Supplement: Supplementary file 1 [file 1]

### ■ Table S1 Mapping Statistics

Statistics for sample mapping to the mouse genome, using Bowtie2.

| Statistics                | WT     |        |        | WT Stress |        |        | <i>Ccnc</i> <sup>-/-</sup> |        |        |
|---------------------------|--------|--------|--------|-----------|--------|--------|----------------------------|--------|--------|
|                           | 1      | 2      | 3      | 1         | 2      | 3      | 1                          | 2      | 3      |
| Total Paired Reads Mapped | 2.18E7 | 2.29E7 | 2.31E7 | 2.41E7    | 2.62E7 | 1.89E7 | 2.35E7                     | 2.44E7 | 2.37E7 |
| Alignment Rate (%)        | 81.2   | 78.8   | 84.0   | 78.8      | 85.0   | 80.1   | 80.7                       | 83.4   | 79.6   |

■ **Table S2 WT Stress DGE Data**

Top 50 repressed and induced genes in WT Stress MEFs, using DESeq2.

| Repressed Genes       | Log <sub>2</sub> FC <sup>a</sup> | FDR <sup>b</sup> | Induced Genes    | Log <sub>2</sub> FC | FDR       |
|-----------------------|----------------------------------|------------------|------------------|---------------------|-----------|
| <i>Col3a1</i>         | -3.08                            | 1.55E-27         | <i>Inka2</i>     | 3.80                | 1.34E-69  |
| <i>F2rl1</i>          | -2.86                            | 3.24E-49         | <i>Ovgp1</i>     | 3.73                | 3.09E-38  |
| <i>Prelp</i>          | -2.69                            | 1.43E-17         | <i>Btnl9</i>     | 3.54                | 1.88E-23  |
| <i>Tmem119</i>        | -2.63                            | 2.29E-150        | <i>Evpl</i>      | 3.47                | 1.39E-24  |
| <i>Angptl4</i>        | -2.62                            | 8.35E-94         | <i>Zfp750</i>    | 3.31                | 1.54E-23  |
| <i>Cmklr1</i>         | -2.53                            | 5.05E-16         | <i>Sec14l5</i>   | 3.15                | 7.42E-18  |
| <i>Serpinb1a</i>      | -2.49                            | 1.69E-13         | <i>Trp53inp1</i> | 3.15                | 7.42E-18  |
| <i>Thbs1</i>          | -2.34                            | 4.25E-274        | <i>Ddit4l</i>    | 3.03                | 6.19E-48  |
| <i>Zfp608</i>         | -2.33                            | 4.22E-89         | <i>Efcab8</i>    | 2.98                | 3.26E-24  |
| <i>Gas1</i>           | -2.26                            | 3.29E-246        | <i>Cyp27b1</i>   | 2.87                | 8.81E-16  |
| <i>Wisp2</i>          | -2.23                            | 2.56E-35         | <i>Gpr152</i>    | 2.87                | 5.92E-15  |
| <i>Apln</i>           | -2.20                            | 1.31E-55         | <i>Atg9b</i>     | 2.86                | 9.84E-37  |
| <i>Angptl7</i>        | -2.16                            | 3.10E-14         | <i>Slc23a3</i>   | 2.70                | 9.64E-13  |
| <i>Gper1</i>          | -2.11                            | 7.06E-11         | <i>Pmaip1</i>    | 2.64                | 3.25E-23  |
| <i>Cd248</i>          | -2.10                            | 1.39E-209        | <i>Gm29106</i>   | 2.60                | 6.52E-16  |
| <i>9930111J21Rik2</i> | -2.10                            | 2.11E-10         | <i>Rprm</i>      | 2.59                | 2.21E-13  |
| <i>Soon2</i>          | -2.08                            | 1.07E-10         | <i>Grin3b</i>    | 2.58                | 1.27E-37  |
| <i>Emilin</i>         | -2.06                            | 7.29E-108        | <i>Slc16a8</i>   | 2.55                | 6.06E-15  |
| <i>Styk1</i>          | -2.06                            | 5.42E-17         | <i>Tcam1</i>     | 2.53                | 7.65E-20  |
| <i>Cx3cl1</i>         | -2.06                            | 2.00E-162        | <i>Fscn2</i>     | 2.52                | 7.82E-14  |
| <i>Mme</i>            | -2.05                            | 4.97E-29         | <i>Il17f</i>     | 2.46                | 8.77E-11  |
| <i>Lipg</i>           | -2.04                            | 1.73E-49         | <i>Hic1</i>      | 2.45                | 1.07E-14  |
| <i>Clmp</i>           | -2.03                            | 4.87E-11         | <i>Alpk3</i>     | 2.42                | 3.64E-10  |
| <i>Sned1</i>          | -2.03                            | 9.06E-12         | <i>Sptbn2</i>    | 2.41                | 2.21E-28  |
| <i>Plxna2</i>         | -2.03                            | 7.24E-132        | <i>Gas2l1</i>    | 2.34                | 3.22E-15  |
| <i>Ptgfr</i>          | -2.01                            | 6.66E-9          | <i>Olfra461</i>  | 2.37                | 3.45E-9   |
| <i>Tgfb1</i>          | -1.96                            | 4.35E-21         | <i>H2-DMA</i>    | 2.31                | 1.33E-14  |
| <i>Bmp2</i>           | -1.95                            | 1.63E-70         | <i>Rsph10b</i>   | 2.30                | 1.70E-9   |
| <i>Scd2</i>           | -1.95                            | 1.10E-299        | <i>Slc7a3</i>    | 2.30                | 3.71E-9   |
| <i>Dchs2</i>          | -1.95                            | 9.60E-25         | <i>Mmp15</i>     | 2.26                | 3.93E-14  |
| <i>S1pr3</i>          | -1.94                            | 4.43E-53         | <i>Chrn2</i>     | 2.24                | 3.52E-15  |
| <i>Cdh3</i>           | -1.89                            | 2.06E-30         | <i>Ermap</i>     | 2.24                | 1.27E-8   |
| <i>Itgbl1</i>         | -1.89                            | 2.30E-14         | <i>Creb3l3</i>   | 2.24                | 1.22E-9   |
| <i>Lfng</i>           | -1.87                            | 1.28E-40         | <i>Sapcd1</i>    | 2.22                | 1.15E-8   |
| <i>Angpt1</i>         | -1.87                            | 3.62E-9          | <i>Wfikkn1</i>   | 2.21                | 4.13E-19  |
| <i>Dhrs1</i>          | -1.86                            | 9.77E-7          | <i>Sesn2</i>     | 2.20                | 2.40E-203 |
| <i>Wisp1</i>          | -1.86                            | 1.97E-111        | <i>Fam186a</i>   | 2.18                | 2.71E-8   |
| <i>Elovl6</i>         | -1.86                            | 1.14E-214        | <i>Kcnj4</i>     | 2.17                | 4.08E-17  |

<sup>a</sup> Log<sub>2</sub>FC = Fold change as expressed as log base 2.<sup>b</sup> FDR = Adjusted p-value using Benjamini and Hochberg method in DESeq2.

■ **Table S2 Continued WT Stress DGE Data**

Top 50 repressed and induced genes in WT Stress MEFs, using DESeq2.

| Repressed Genes | Log <sub>2</sub> FC <sup>a</sup> | FDR <sup>b</sup> | Induced Genes  | Log <sub>2</sub> FC | FDR      |
|-----------------|----------------------------------|------------------|----------------|---------------------|----------|
| <i>Pcdh19</i>   | -1.85                            | 3.99E-45         | <i>Arhgef6</i> | 2.16                | 2.53E-8  |
| <i>Ntn4</i>     | -1.84                            | 9.42E-29         | <i>Rbm3</i>    | 2.14                | 1.45E-26 |
| <i>Ngnf</i>     | -1.84                            | 5.99E-15         | <i>Dpx1</i>    | 2.13                | 3.25E-23 |
| <i>Gm14137</i>  | -1.82                            | 3.20E-48         | <i>Mdm2</i>    | 2.12                | 4.61E-8  |
| <i>Plat</i>     | -1.81                            | 1.93E-28         | <i>Tex52</i>   | 2.10                | 1.15E-7  |
| <i>Setbp1</i>   | -1.81                            | 2.07E-24         | <i>Slc26a8</i> | 2.09                | 3.41E-8  |
| <i>Fat4</i>     | -1.81                            | 1.69E-86         | <i>Gng3</i>    | 2.09                | 2.40E-20 |
| <i>Pappa</i>    | -1.79                            | 1.70E-14         | <i>Aen</i>     | 2.07                | 3.51E-39 |
| <i>Adamts5</i>  | -1.79                            | 6.99E-76         | <i>Rho</i>     | 2.02                | 3.28E-7  |
| <i>Ephb6</i>    | -1.78                            | 4.78E-41         | <i>Gzmm</i>    | 2.02                | 2.99E-9  |
| <i>Zfp36l2</i>  | -1.77                            | 6.90E-229        | <i>Pmm1</i>    | 2.02                | 6.67E-8  |

<sup>a</sup> Log<sub>2</sub>FC = Fold change as expressed as log base 2.

<sup>b</sup> FDR = Adjusted p-value using Benjamini and Hochberg method in DESeq2.

**Table S3 Oxidative Stress-Repressed Genes in WT MEFs**

GO-Functional Annotation Clusters for repressed genes in WT MEFs following oxidative stress. The following clusters (1-4) resulting from DAVID-GO Functional Annotation Clustering, represent the genes repressed (1,966 genes).

| Cluster | ES <sup>a</sup> | Category <sup>b</sup> | Associated Terms                                | p-value  | Number of Genes Involved |
|---------|-----------------|-----------------------|-------------------------------------------------|----------|--------------------------|
| 1       | 12.41           | GOTERM MF DIRECT      | Cadherin binding involved in cell-cell adhesion | 8.73E-17 | 76                       |
|         |                 | GOTERM CC DIRECT      | Cell-cell adherens junction                     | 3.83E-15 | 78                       |
|         |                 | GOTERM BP DIRECT      | Cell-cell adhesion                              | 1.80E-7  | 43                       |
| 2       | 6.88            | GOTERM MF DIRECT      | Transferase Activity                            | 5.38E-9  | 210                      |
|         |                 | GOTERM BP DIRECT      | Protein phosphorylation                         | 1.28E-8  | 99                       |
|         |                 | GOTERM MF DIRECT      | ATP binding                                     | 1.42E-8  | 212                      |
|         |                 | GOTERM BP DIRECT      | Phosphorylation                                 | 1.93E-8  | 103                      |
|         |                 | GOTERM MF DIRECT      | Kinase activity                                 | 3.07E-8  | 111                      |
| 3       | 6.84            | UP KEYWORDS           | Cell cycle                                      | 4.25E-10 | 102                      |
|         |                 | UP KEYWORDS           | Cell division                                   | 1.93E-9  | 69                       |
|         |                 | GOTERM BP DIRECT      | Cell cycle                                      | 1.64E-7  | 100                      |
|         |                 | GOTERM BP DIRECT      | Cell division                                   | 1.81E-7  | 69                       |
|         |                 | UP KEYWORDS           | Mitosis                                         | 9.54E-6  | 45                       |
|         |                 | GOTERM MF DIRECT      | Mitotic nuclear division                        | 4.06E-5  | 49                       |
| 4       | 5.90            | UP KEYWORDS           | Oxidoreductase                                  | 1.69E-7  | 95                       |
|         |                 | GOTERM BP DIRECT      | Oxidation-reduction process                     | 2.55E-6  | 100                      |
|         |                 | GOTERM MF DIRECT      | Oxidoreductase activity                         | 4.73E-6  | 94                       |

<sup>a</sup> ES = Enrichment score produced by Functional Annotation Clustering in DAVID.

<sup>b</sup> Category Terms Defined: GOTERM MF DIRECT = GO Term for Direct Involvement in Molecular Function; GOTERM CC DIRECT = GO Term for Direct Localization to Cellular Compartment; GOTERM BP DIRECT = GO Term for Direct Involvement in Biological Process; UP Keywords = Uniprot Keywords

■ **Table S4 Oxidative Stress-Induced Genes in WT MEFs**

GO-Functional Annotation Clusters for induced genes in WT MEFs following oxidative stress. The following clusters (1-4) resulting from DAVID-GO Functional Annotation Clustering, represent the genes induced (1,875 genes).

| Cluster | ES <sup>a</sup> | Category <sup>b</sup> | Associated Terms                         | p-value | Number of Genes Involved |
|---------|-----------------|-----------------------|------------------------------------------|---------|--------------------------|
| 1       | 6.38            | GOTERM BP DIRECT      | Cellular response to DNA damage stimulus | 1.86E-8 | 72                       |
|         |                 | UP KEYWORDS           | DNA damage                               | 6.44E-8 | 58                       |
|         |                 | GOTERM BP DIRECT      | DNA repair                               | 1.82E-6 | 54                       |
|         |                 | UP KEYWORDS           | DNA repair                               | 1.36E-5 | 45                       |
| 2       | 4.93            | UP KEYWORDS           | Ubl conjugation pathway                  | 4.44E-9 | 95                       |
|         |                 | GOTERM BP DIRECT      | Protein ubiquitination                   | 4.68E-6 | 58                       |
|         |                 | GOTERM MF DIRECT      | Ubiquitin-protein transferase activity   | 1.50E-4 | 49                       |
|         |                 | GOTERM MF DIRECT      | Ubiquitin protein ligase activity        | 6.26E-3 | 29                       |
| 3       | 4.15            | GOTERM BP DIRECT      | Autophagy                                | 8.16E-6 | 30                       |
|         |                 | GOTERM CC DIRECT      | Autophagosome                            | 2.05E-4 | 16                       |
|         |                 | GOTERM BP DIRECT      | Autophagosome assembly                   | 3.38E-3 | 11                       |
| 4       | 3.46            | UP KEYWORDS           | Protein Transport                        | 4.47E-6 | 79                       |
|         |                 | GOTERM BP DIRECT      | Protein transport                        | 4.43E-5 | 80                       |
|         |                 | UP KEYWORDS           | Transport                                | 4.55E-3 | 185                      |
|         |                 | GOTERM BP DIRECT      | Transport                                | 1.55E-2 | 182                      |

<sup>a</sup> ES = Enrichment score produced by Functional Annotation Clustering in DAVID.

<sup>b</sup> Category Terms Defined: GOTERM BP DIRECT = GO Term for Direct Involvement in Biological Process; UP Keywords = Uniprot Keywords; GOTERM MF DIRECT = GO Term for Direct Involvement in Molecular Function; GOTERM CC DIRECT = GO Term for Direct Localization to Cellular Compartment

■ **Table S5 *Ccnc*<sup>-/-</sup> DGE Data**Top 50 repressed and induced genes in *Ccnc*<sup>-/-</sup> MEFs, using DESeq2.

| Repressed Genes      | Log <sub>2</sub> FC <sup>a</sup> | FDR <sup>b</sup> | Induced Genes   | Log <sub>2</sub> FC | FDR       |
|----------------------|----------------------------------|------------------|-----------------|---------------------|-----------|
| <i>Cxcl5</i>         | -8.85                            | 1.46E-292        | <i>Pitx1</i>    | 7.90                | 3.49E-175 |
| <i>Efemp1</i>        | -7.89                            | 1.65E-191        | <i>Sall1</i>    | 7.60                | 1.74E-168 |
| <i>Sox2</i>          | -6.92                            | 1.20E-112        | <i>Acta2</i>    | 6.45                | 1.20E-298 |
| <i>Grem1</i>         | -6.89                            | 7.74E-115        | <i>Scara3</i>   | 6.41                | 4.81E-92  |
| <i>Vldlr</i>         | -6.87                            | 7.67E-111        | <i>Galm</i>     | 5.96                | 2.37E-105 |
| <i>Pcdh17</i>        | -6.60                            | 6.38E-130        | <i>Sim2</i>     | 5.80                | 4.78E-70  |
| <i>Tbx5</i>          | -6.53                            | 7.24E-86         | <i>Pcolce2</i>  | 5.80                | 5.40E-122 |
| <i>Ston2</i>         | -6.19                            | 2.10E-122        | <i>Ltbr</i>     | 5.75                | 2.78E-226 |
| <i>Igfbp4</i>        | -5.90                            | 1.67E-96         | <i>Hoxb4</i>    | 5.73                | 1.68E-75  |
| <i>Penk</i>          | -5.82                            | 9.01E-92         | <i>Sox11</i>    | 5.14                | 1.89E-185 |
| <i>Igfbp3</i>        | -5.80                            | 5.10E-148        | <i>Mmp2</i>     | 5.05                | 1.75E-84  |
| <i>Foxg1</i>         | -5.74                            | 2.55E-67         | <i>Meox2</i>    | 4.98                | 2.38E-46  |
| <i>Sfrp2</i>         | -5.66                            | 1.14E-188        | <i>Hoxc13</i>   | 4.92                | 3.53E-45  |
| <i>Ackr3</i>         | -5.24                            | 1.75E-140        | <i>Peg12</i>    | 4.92                | 1.78E-48  |
| <i>Slc16a2</i>       | -5.17                            | 8.83E-260        | <i>Hoxb13</i>   | 4.91                | 9.55E-48  |
| <i>Acot1</i>         | -5.05                            | 7.24E-48         | <i>Trim71</i>   | 4.87                | 8.26E-83  |
| <i>Pik3r5</i>        | -5.00                            | 1.30E-297        | <i>Plekha2</i>  | 4.86                | 6.54E-45  |
| <i>Slc22a4</i>       | -4.73                            | 9.73E-42         | <i>Nid2</i>     | 4.84                | 1.54E-221 |
| <i>Nfatc4</i>        | -4.64                            | 7.78E-95         | <i>Boc</i>      | 4.70                | 7.25E-52  |
| <i>Arap2</i>         | -4.63                            | 1.30E-55         | <i>Six2</i>     | 4.68                | 6.07E-41  |
| <i>Klf12</i>         | -4.62                            | 8.09E-38         | <i>Bicc1</i>    | 4.62                | 1.31E-229 |
| <i>4930452B06Rik</i> | -4.59                            | 3.51E-37         | <i>Trim30a</i>  | 4.42                | 2.28E-39  |
| <i>Mab21l1</i>       | -4.53                            | 6.94E-52         | <i>Myl9</i>     | 4.39                | 1.02E-68  |
| <i>S1pr3</i>         | -4.53                            | 2.00E-173        | <i>Ifnlr1</i>   | 4.38                | 1.47E-42  |
| <i>Pappa</i>         | -4.43                            | 5.93E-42         | <i>Rsad2</i>    | 4.38                | 1.73E-45  |
| <i>Zic2</i>          | -4.37                            | 2.07E-93         | <i>Gpnmb</i>    | 4.30                | 1.20E-299 |
| <i>Sp9</i>           | -4.20                            | 2.51E-43         | <i>Lgals3bp</i> | 4.19                | 6.48E-190 |
| <i>Kcnj2</i>         | -4.15                            | 3.25E-192        | <i>Flt4</i>     | 4.18                | 1.33E-48  |
| <i>Cd34</i>          | -4.14                            | 1.35E-29         | <i>Slc2a10</i>  | 4.15                | 3.68E-29  |
| <i>Nid1</i>          | -4.14                            | 1.00E-298        | <i>Gsdmd</i>    | 4.14                | 1.68E-31  |
| <i>Fgf5</i>          | -4.14                            | 6.29E-28         | <i>Paqr9</i>    | 4.05                | 3.95E-29  |
| <i>Osr1</i>          | -4.09                            | 1.30E-296        | <i>Cplx2</i>    | 4.00                | 1.88E-138 |
| <i>Lonrf3</i>        | -4.00                            | 8.01E-28         | <i>Fam217b</i>  | 3.92                | 8.64E-41  |
| <i>Sema4f</i>        | -4.00                            | 3.50E-32         | <i>Lifr</i>     | 3.89                | 4.71E-130 |
| <i>Zic5</i>          | -3.96                            | 1.38E-40         | <i>Mrgpre</i>   | 3.89                | 1.26E-56  |
| <i>Gnai1</i>         | -3.90                            | 2.79E-32         | <i>Evx2</i>     | 3.86                | 1.35E-36  |
| <i>Enpp2</i>         | -3.86                            | 2.95E-49         | <i>Armcx4</i>   | 3.79                | 4.54E-142 |
| <i>Pcdhgb5</i>       | -3.85                            | 1.95E-39         | <i>Flrt2</i>    | 3.78                | 1.32E-108 |

<sup>a</sup> Log<sub>2</sub>FC = Fold change as expressed as log base 2.<sup>b</sup> FDR = Adjusted p-value using Benjamini and Hochberg method in DESeq2.

■ **Table S5 Continued *Ccnc*<sup>-/-</sup> DGE Data**

Top 50 repressed and induced genes in *Ccnc*<sup>-/-</sup> MEFs, using DESeq2.

| Repressed Genes | Log <sub>2</sub> FC <sup>a</sup> | FDR <sup>b</sup> | Induced Genes        | Log <sub>2</sub> FC | FDR      |
|-----------------|----------------------------------|------------------|----------------------|---------------------|----------|
| <i>Fam110c</i>  | -3.85                            | 8.29E-24         | <i>P4ha3</i>         | 3.77                | 6.02E-34 |
| <i>Gm43517</i>  | -3.80                            | 2.77E-23         | <i>Msx1</i>          | 3.77                | 4.40E-65 |
| <i>Tubb3</i>    | -3.76                            | 1.30E-55         | <i>2310030G06Rik</i> | 3.75                | 3.53E-24 |
| <i>Bmp6</i>     | -3.73                            | 1.61E-23         | <i>Lmcd1</i>         | 3.75                | 4.84E-26 |
| <i>Itgbl1</i>   | -3.72                            | 1.63E-35         | <i>Selp</i>          | 3.74                | 1.12E-22 |
| <i>Fgf7</i>     | -3.66                            | 1.12E-40         | <i>Asxl2</i>         | 3.73                | 5.33E-36 |
| <i>Ar</i>       | -3.62                            | 8.35E-22         | <i>Sgcd</i>          | 3.73                | 5.34E-23 |
| <i>Dlx3</i>     | -3.61                            | 3.52E-24         | <i>Esr1</i>          | 3.72                | 1.04E-24 |
| <i>Slit3</i>    | -3.60                            | 2.41E-21         | <i>Ulbp1</i>         | 3.65                | 2.45E-68 |
| <i>Prelp</i>    | -3.55                            | 1.39E-28         | <i>Oas1a</i>         | 3.59                | 6.96E-26 |
| <i>Zdhhc15</i>  | -3.53                            | 9.39E-66         | <i>Hoxb7</i>         | 3.59                | 1.38E-20 |
| <i>Pkp1</i>     | -3.48                            | 2.28E-49         | <i>Hoxb7</i>         | 3.59                | 1.60E-43 |

<sup>a</sup> Log<sub>2</sub>FC = Fold change as expressed as log base 2.

<sup>b</sup> FDR = Adjusted p-value using Benjamini and Hochberg method in DESeq2.

**Table S6 Cyclin C-Dependent Genes**

GO-Functional Annotation Clusters for repressed genes in *Ccnc*<sup>-/-</sup> MEFs. The following clusters (1-4) resulting from DAVID-GO Functional Annotation Clustering, represent the genes repressed (2,353 genes).

| Cluster | ES <sup>a</sup> | Category <sup>b</sup> | Associated Terms                                | p-value  | Number of Genes Involved |
|---------|-----------------|-----------------------|-------------------------------------------------|----------|--------------------------|
| 1       | 19.06           | UP KEYWORDS           | Mitochondrion                                   | 1.52E-26 | 222                      |
|         |                 | GOTERM CC DIRECT      | Mitochondrion                                   | 1.68E-25 | 327                      |
|         |                 | UP KEYWORDS           | Transit peptide                                 | 4.91E-19 | 121                      |
| 2       | 6.78            | UP KEYWORDS           | Oxidoreductase                                  | 8.07E-8  | 109                      |
|         |                 | GOTERM BP DIRECT      | Oxidation-reduction process                     | 1.91E-7  | 121                      |
|         |                 | GOTERM MF DIRECT      | Oxidoreductase activity                         | 3.16E-7  | 110                      |
| 3       | 4.49            | GOTERM MF DIRECT      | Cadherin binding involved in cell-cell adhesion | 2.44E-6  | 59                       |
|         |                 | GOTERM CC DIRECT      | Cell-cell adherens junction                     | 2.67E-5  | 60                       |
|         |                 | GOTERM BP DIRECT      | Cell-cell adhesion                              | 5.11E-4  | 38                       |
| 4       | 3.23            | UP KEYWORDS           | Cell cycle                                      | 3.32E-7  | 105                      |
|         |                 | GOTERM BP DIRECT      | Cell cycle                                      | 1.76E-5  | 104                      |
|         |                 | UP KEYWORDS           | Cell division                                   | 1.85E-3  | 57                       |
|         |                 | GOTERM BP DIRECT      | Cell division                                   | 1.02E-2  | 58                       |
|         |                 | GOTERM BP DIRECT      | Mitotic nuclear division                        | 1.73E-2  | 44                       |
|         |                 | UP KEYWORDS           | Mitosis                                         | 2.16E-2  | 38                       |

<sup>a</sup> ES = Enrichment score produced by Functional Annotation Clustering in DAVID.

<sup>b</sup> Category Terms Defined: UP Keywords = Uniprot Keywords; GOTERM CC DIRECT = GO Term for Direct Localization to Cellular Compartment; GOTERM BP DIRECT = GO Term for Direct Involvement in Biological Process;; GOTERM MF DIRECT = GO Term for Direct Involvement in Molecular Function



■ **Table S7 Cyclin C-Repressed Genes**

GO-Functional Annotation Clusters for induced genes in *Ccnc*<sup>-/-</sup> MEFs. The following clusters (1-4) resulting from DAVID-GO Functional Annotation Clustering, represent the genes induced (2,482 genes).

| Cluster | ES <sup>a</sup> | Category <sup>b</sup> | Associated Terms                       | p-value  | Number of Genes Involved |
|---------|-----------------|-----------------------|----------------------------------------|----------|--------------------------|
| 1       | 8.39            | UP KEYWORDS           | Lysosome                               | 3.03E-11 | 65                       |
|         |                 | GOTERM CC DIRECT      | Lysosomal membrane                     | 1.80E-8  | 59                       |
|         |                 | GOTERM CC DIRECT      | Lysosome                               | 1.23E-7  | 73                       |
| 2       | 6.68            | UP KEYWORDS           | Ubl conjugation pathway                | 3.14E-12 | 128                      |
|         |                 | GOTERM MF DIRECT      | Ubiquitin-protein transferase activity | 2.27E-6  | 70                       |
|         |                 | GOTERM BP DIRECT      | Protein ubiquitination                 | 3.31E-6  | 75                       |
|         |                 | GOTERM MF DIRECT      | Ligase activity                        | 8.38E-5  | 70                       |
| 3       | 6.56            | UP KEYWORDS           | Protein transport                      | 1.35E-10 | 115                      |
|         |                 | GOTERM BP DIRECT      | Protein transport                      | 5.34E-9  | 121                      |
|         |                 | UP KEYWORDS           | Transport                              | 9.79E-6  | 265                      |
|         |                 | GOTERM BP DIRECT      | Transport                              | 8.34E-4  | 264                      |
| 4       | 3.51            | KEGG PATHWAY          | Melanogenesis                          | 3.80E-6  | 29                       |
|         |                 | GOTERM BP DIRECT      | Canonical Wnt signaling pathway        | 2.80E-4  | 24                       |
|         |                 | KEGG PATHWAY          | Wnt signaling pathway                  | 1.22E-3  | 30                       |
|         |                 | KEGG PATHWAY          | Basal cell carcinoma                   | 6.99E-3  | 14                       |

<sup>a</sup> ES = Enrichment score produced by Functional Annotation Clustering in DAVID.

<sup>b</sup> Category Terms Defined: UP Keywords = Uniprot Keywords; GOTERM CC DIRECT = GO Term for Direct Localization to Cellular Compartment; GOTERM MF DIRECT = GO Term for Direct Involvement in Molecular Function; GOTERM BP DIRECT = GO Term for Direct Involvement in Biological Process; KEGG PATHWAY = KEGG Pathway Association

■ **Table S8 Overlapping DGE Data**Overlapping repressed and induced genes in WT Stress and *Ccnc*<sup>-/-</sup> MEFs, as determined using DESeq2.

|                 | <i>Ccnc</i> <sup>-/-</sup>       |                  | WT Stress           |           |                 | <i>Ccnc</i> <sup>-/-</sup> |          | WT Stress           |          |
|-----------------|----------------------------------|------------------|---------------------|-----------|-----------------|----------------------------|----------|---------------------|----------|
| Repressed Genes | Log <sub>2</sub> FC <sup>a</sup> | FDR <sup>b</sup> | Log <sub>2</sub> FC | FDR       | Induced Genes   | Log <sub>2</sub> FC        | FDR      | Log <sub>2</sub> FC | FDR      |
| <i>Cxcl5</i>    | -8.85                            | 1.50E-292        | -1.64               | 3.70E-126 | <i>Pla2g16</i>  | 2.99                       | 8.75E-16 | 1.01                | 1.91E-2  |
| <i>Sox2</i>     | -6.92                            | 1.20E-112        | -1.23               | 1.93E-28  | <i>Cfap53</i>   | 2.91                       | 2.83E-13 | 1.62                | 5.81E-05 |
| <i>Pcdh17</i>   | -6.60                            | 6.40E-130        | -1.01               | 2.47E-23  | <i>Eda2r</i>    | 2.26                       | 3.74E-15 | 1.02                | 6.66E-3  |
| <i>Sfrp2</i>    | -5.66                            | 1.1E-188         | -1.33               | 4.61E-32  | <i>Ikzf4</i>    | 2.02                       | 1.50E-06 | 1.28                | 1.67E-3  |
| <i>Ackr3</i>    | -5.24                            | 1.7E-140         | -1.74               | 4.70E-47  | <i>Tbx2</i>     | 2.02                       | 3.29E-07 | 1.52                | 1.41E-4  |
| <i>S1pr3</i>    | -4.53                            | 2.00E-173        | -1.94               | 4.43E-53  | <i>Fbxl22</i>   | 1.90                       | 3.37E-07 | 1.22                | 2.59E-3  |
| <i>Pappa</i>    | -4.43                            | 5.93E-42         | -1.79               | 1.70E-14  | <i>Rab11b</i>   | 1.87                       | 3.71E-73 | 1.55                | 2.25E-47 |
| <i>Kcnj2</i>    | -4.15                            | 3.30E-192        | -1.42               | 4.92E-36  | <i>Rprm</i>     | 1.83                       | 5.90E-06 | 2.59                | 2.21E-13 |
| <i>Osr1</i>     | -4.09                            | 1.02E-299        | -1.11               | 4.66E-74  | <i>Lims2</i>    | 1.82                       | 1.52E-05 | 1.25                | 2.88E-3  |
| <i>Gm43517</i>  | -3.80                            | 2.77E-23         | -1.13               | 2.60E-4   | <i>Ephb2</i>    | 1.76                       | 2.04E-11 | 1.41                | 4.79E-7  |
| <i>Itgbl1</i>   | -3.72                            | 1.63E-35         | -1.89               | 2.30E-14  | <i>Srrm4</i>    | 1.65                       | 6.97E-10 | 1.13                | 1.99E-4  |
| <i>Fgf7</i>     | -3.66                            | 1.12E-40         | -1.42               | 6.97E-12  | <i>Nat8f4</i>   | 1.60                       | 4.34E-07 | 1.14                | 1.30E-3  |
| <i>Prep</i>     | -3.55                            | 1.39E-28         | -2.69               | 1.43E-17  | <i>Slc16a8</i>  | 1.56                       | 8.31E-5  | 2.55                | 6.06E-15 |
| <i>Pkp1</i>     | -3.48                            | 2.28E-49         | -1.17               | 5.50E-11  | <i>Olf920</i>   | 1.49                       | 3.76E-4  | 1.08                | 5.41E-3  |
| <i>Trib2</i>    | -3.39                            | 8.31E-54         | -1.63               | 1.44E-18  | <i>Gas2l1</i>   | 1.49                       | 3.79E-05 | 2.34                | 3.22E-15 |
| <i>Slit2</i>    | -3.30                            | 1.09E-28         | -1.32               | 2.17E-08  | <i>Fermt3</i>   | 1.46                       | 2.12E-05 | 1.35                | 7.23E-05 |
| <i>Fgf10</i>    | -3.18                            | 9.59E-50         | -1.52               | 3.31E-18  | <i>Hypk</i>     | 1.44                       | 7.21E-05 | 1.89                | 5.24E-09 |
| <i>Adora2b</i>  | -3.13                            | 4.56E-25         | -1.08               | 1.06E-05  | <i>Inha</i>     | 1.44                       | 5.19E-10 | 1.16                | 3.45E-06 |
| <i>Foxq1</i>    | -3.10                            | 5.38E-61         | -1.09               | 6.45E-11  | <i>Prob1</i>    | 1.39                       | 3.34E-06 | 1.26                | 4.97E-05 |
| <i>Ephb6</i>    | -3.05                            | 6.11E-93         | -1.78               | 4.78E-41  | <i>Mmp15</i>    | 1.39                       | 1.17E-4  | 2.26                | 3.93E-14 |
| <i>Lypd6b</i>   | -3.04                            | 4.26E-16         | -1.46               | 9.93E-06  | <i>Garem2</i>   | 1.35                       | 6.92E-08 | 1.24                | 1.84E-06 |
| <i>Cd248</i>    | -3.03                            | 1.22E-298        | -2.10               | 1.40E-209 | <i>Mpeg1</i>    | 1.30                       | 1.94E-3  | 1.36                | 7.15E-4  |
| <i>Bdkrb2</i>   | -3.00                            | 4.13E-77         | -1.23               | 6.76E-15  | <i>Arhgef6</i>  | 1.29                       | 3.18E-3  | 2.16                | 2.53E-08 |
| <i>Cdh3</i>     | -2.98                            | 2.14E-60         | -1.89               | 2.06E-30  | <i>Car14</i>    | 1.27                       | 3.75E-3  | 1.57                | 9.64E-05 |
| <i>Ndnf</i>     | -2.90                            | 9.64E-29         | -1.84               | 5.99E-15  | <i>Gpr156</i>   | 1.24                       | 3.41E-3  | 1.49                | 1.60E-4  |
| <i>Cspg4</i>    | -2.81                            | 1.23E-297        | -1.17               | 7.51E-56  | <i>Rbm7</i>     | 1.22                       | 5.92E-3  | 1.05                | 1.53E-2  |
| <i>Adm</i>      | -2.76                            | 7.07E-12         | -1.41               | 2.64E-4   | <i>Zc3h12c</i>  | 1.21                       | 1.84E-4  | 1.01                | 3.36E-3  |
| <i>Spon2</i>    | -2.75                            | 1.04E-15         | -2.08               | 1.07E-10  | <i>Nptn</i>     | 1.20                       | 3.58E-4  | 1.06                | 2.86E-3  |
| <i>Dcdc2c</i>   | -2.74                            | 2.26E-11         | -1.57               | 5.12E-05  | <i>Plekhhg6</i> | 1.17                       | 2.82E-3  | 1.90                | 1.24E-08 |
| <i>Angptl4</i>  | -2.68                            | 5.49E-95         | -2.62               | 8.35E-94  | <i>Chrnb2</i>   | 1.16                       | 7.11E-4  | 2.24                | 3.52E-15 |
| <i>Cavin4</i>   | -2.67                            | 2.10E-127        | -1.67               | 6.39E-69  | <i>Gabarap</i>  | 1.15                       | 9.60E-5  | 1.69                | 4.11E-11 |
| <i>Rgs2</i>     | -2.64                            | 2.75E-20         | -1.21               | 2.28E-06  | <i>Depdc7</i>   | 1.11                       | 2.92E-08 | 1.32                | 2.38E-10 |
| <i>Ahr</i>      | -2.63                            | 6.70E-146        | -1.28               | 9.11E-43  | <i>Zfr2</i>     | 1.11                       | 1.95E-4  | 1.42                | 2.64E-07 |
| <i>Arsj</i>     | -2.62                            | 1.10E-42         | -1.76               | 5.36E-25  | <i>Blzf1</i>    | 1.09                       | 7.32E-3  | 1.06                | 8.25E-3  |
| <i>Epha8</i>    | -2.57                            | 3.34E-11         | -1.51               | 3.43E-05  | <i>Rasl11a</i>  | 1.08                       | 1.27E-4  | 1.07                | 2.66E-4  |
| <i>Fam43a</i>   | -2.49                            | 2.60E-193        | -1.04               | 7.18E-49  | <i>Nat8l</i>    | 1.06                       | 1.74E-2  | 1.01                | 1.63E-2  |
| <i>Ptgr</i>     | -2.44                            | 1.05E-11         | -2.01               | 6.66E-09  | <i>Grin3b</i>   | 1.06                       | 1.29E-4  | 2.58                | 1.27E-37 |

<sup>a</sup> Log<sub>2</sub>FC = Fold change as expressed as log base 2.<sup>b</sup> FDR = Adjusted p-value using Benjamini and Hochberg method in DESeq2.

■ **Table S8 Continued Overlapping DGE Data**

Overlapping repressed and induced genes in WT Stress and *Ccnc*<sup>-/-</sup> MEFs, as determined using DESeq2.

| Repressed Genes       | <i>Ccnc</i> <sup>-/-</sup>       |                  | WT Stress           |           | Induced Genes        | <i>Ccnc</i> <sup>-/-</sup> |          | WT Stress           |          |
|-----------------------|----------------------------------|------------------|---------------------|-----------|----------------------|----------------------------|----------|---------------------|----------|
|                       | Log <sub>2</sub> FC <sup>a</sup> | FDR <sup>b</sup> | Log <sub>2</sub> FC | FDR       |                      | Log <sub>2</sub> FC        | FDR      | Log <sub>2</sub> FC | FDR      |
| <i>Ch25h</i>          | -2.43                            | 3.22E-10         | -1.30               | 4.97E-4   | <i>Lrp2bp</i>        | 1.04                       | 1.03E-2  | 1.25                | 1.52E-3  |
| <i>Serpina3i</i>      | -2.42                            | 5.05E-13         | -1.12               | 1.99E-4   | <i>D630039A03Rik</i> | 1.04                       | 1.85E-2  | 1.68                | 3.09E-05 |
| <i>9930111J21Rik2</i> | -2.39                            | 7.35E-14         | -2.10               | 2.12E-10  | <i>Duox1</i>         | 1.01                       | 1.97E-2  | 1.24                | 1.69E-3  |
| <i>Car5b</i>          | -2.38                            | 8.70E-77         | -1.41               | 6.22E-31  | <i>Cfp</i>           | 0.995                      | 1.29E-05 | 1.05                | 3.72E-06 |
| <i>Tmem45a</i>        | -2.38                            | 2.38E-23         | -1.09               | 1.18E-07  | <i>Ccdc188</i>       | 0.990                      | 2.11E-2  | 1.07                | 8.55E-3  |
| <i>Mme</i>            | -2.36                            | 1.43E-37         | -2.05               | 4.97E-29  | <i>Zfp444</i>        | 0.960                      | 2.41E-2  | 1.52                | 4.62E-05 |
| <i>Tspan11</i>        | -2.34                            | 1.89E-08         | -1.26               | 2.20E-3   | <i>Dtx3</i>          | 0.946                      | 9.42E-3  | 1.28                | 1.16E-4  |
| <i>Ptx3</i>           | -2.29                            | 1.24E-299        | -1.74               | 3.10E-220 | <i>Klhl24</i>        | 0.937                      | 1.03E-32 | 1.10                | 3.17E-43 |
| <i>Mbp</i>            | -2.27                            | 4.16E-13         | -1.06               | 2.57E-4   | <i>Pmaip1</i>        | 0.931                      | 2.36E-09 | 2.64                | 3.25E-23 |
| <i>Pcdh19</i>         | -2.25                            | 3.37E-62         | -1.85               | 3.99E-45  | <i>Ptbp1</i>         | 0.897                      | 3.26E-2  | 1.05                | 7.29E-3  |
| <i>Tnfrif6</i>        | -2.19                            | 2.74E-10         | -1.52               | 4.73E-06  | <i>Sec14l5</i>       | 0.893                      | 3.58E-2  | 3.15                | 7.42E-18 |
| <i>Rnf39</i>          | -2.15                            | 1.56E-34         | -1.02               | 4.01E-11  | <i>Wfikkn1</i>       | 0.888                      | 1.18E-2  | 2.21                | 4.13E-19 |
| <i>Zbtb7c</i>         | -2.12                            | 1.23E-32         | -1.36               | 8.56E-16  | <i>Gtf2h1</i>        | 0.882                      | 9.01E-13 | 0.862               | 5.35E-12 |
| <i>Angptl7</i>        | -2.11                            | 4.05E-13         | -2.16               | 3.10E-14  | <i>Crebrf</i>        | 0.880                      | 1.78E-20 | 1.08                | 2.36E-29 |
| <i>Tlr6</i>           | -2.06                            | 1.91E-09         | -1.01               | 3.51E-3   | <i>Tbc1d8</i>        | 0.864                      | 3.53E-2  | 1.93                | 5.18E-10 |
| <i>Rnf150</i>         | -2.01                            | 2.10E-22         | -1.18               | 3.20E-10  | <i>Jmy</i>           | 0.827                      | 1.93E-28 | 0.663               | 2.01E-18 |
| <i>Ankrd63</i>        | -1.98                            | 2.29E-06         | -1.26               | 2.18E-3   | <i>H2-DMA</i>        | 0.821                      | 4.44E-2  | 2.31                | 1.33E-14 |
| <i>Sema3d</i>         | -1.97                            | 1.21E-20         | -1.47               | 3.84E-13  | <i>Fam89a</i>        | 0.813                      | 2.84E-2  | 1.90                | 1.62E-11 |
| <i>A930002H24Rik</i>  | -1.96                            | 4.97E-09         | -1.04               | 1.15E-3   | <i>Galr2</i>         | 0.806                      | 4.42E-2  | 1.69                | 7.99E-08 |
| <i>Gcnt4</i>          | -1.96                            | 1.73E-60         | -1.56               | 2.27E-36  | <i>Tma16</i>         | 0.789                      | 7.19E-06 | 1.11                | 1.87E-12 |
| <i>Hlf</i>            | -1.90                            | 3.13E-11         | -1.12               | 4.10E-05  | <i>Mafk</i>          | 0.784                      | 9.43E-3  | 1.43                | 4.62E-09 |
| <i>Fam84b</i>         | -1.89                            | 1.30E-20         | -1.06               | 3.08E-08  | <i>Enc1</i>          | 0.784                      | 7.56E-41 | 1.10                | 1.00E-66 |
| <i>Twist1</i>         | -1.89                            | 7.60E-195        | -1.14               | 6.59E-76  | <i>Plpp3</i>         | 0.731                      | 1.17E-4  | 2.00                | 3.92E-54 |
| <i>Mgp</i>            | -1.85                            | 3.41E-06         | -1.59               | 3.77E-05  | <i>Far2</i>          | 0.680                      | 2.17E-2  | 1.58                | 1.14E-11 |
| <i>Cacna1i</i>        | -1.73                            | 9.97E-09         | -1.41               | 1.85E-06  | <i>C1qtnf12</i>      | 0.677                      | 2.81E-2  | 1.32                | 4.83E-07 |
| <i>Egr3</i>           | -1.73                            | 1.54E-05         | -2.51               | 1.35E-55  | <i>Polk</i>          | 0.660                      | 5.70E-05 | 1.73                | 4.18E-37 |
| <i>Cp</i>             | -1.72                            | 1.15E-14         | -1.11               | 5.48E-07  | <i>Amt</i>           | 0.637                      | 1.38E-2  | 1.12                | 6.90E-07 |
| <i>Plpp3</i>          | -1.66                            | 1.18E-30         | -1.20               | 1.06E-16  | <i>Znrf3</i>         | 0.589                      | 1.82E-4  | 0.388               | 2.21E-2  |
| <i>Lox</i>            | -1.61                            | 1.92E-36         | -1.48               | 1.40E-41  | <i>Rev1</i>          | 0.550                      | 1.19E-06 | 1.08                | 1.91E-26 |
| <i>Col6a2</i>         | -1.60                            | 1.35E-12         | -1.18               | 1.22E-07  | <i>Ccdc39</i>        | 0.547                      | 3.43E-2  | 1.08                | 1.74E-06 |
| <i>Plxna2</i>         | -1.58                            | 4.86E-96         | -2.03               | 7.20E-132 | <i>Aen</i>           | 0.535                      | 2.60E-2  | 2.07                | 3.51E-39 |
| <i>Tcf7</i>           | -1.58                            | 1.21E-26         | -1.02               | 5.24E-13  | <i>Mast1</i>         | 0.451                      | 1.74E-2  | 1.42                | 3.68E-23 |
| <i>Zc3h12a</i>        | -1.56                            | 1.25E-61         | -1.06               | 4.33E-30  | <i>Fnip1</i>         | 0.447                      | 2.93E-10 | 1.09                | 6.26E-69 |
| <i>Bmp2</i>           | -1.51                            | 2.18E-64         | -1.95               | 1.63E-70  | <i>Mthfsd</i>        | 0.444                      | 2.85E-2  | 1.54                | 5.85E-24 |
| <i>Ccl2</i>           | -1.48                            | 1.50E-225        | -1.11               | 1.40E-130 | <i>Leng8</i>         | 0.418                      | 3.25E-3  | 1.28                | 1.26E-26 |

<sup>a</sup> Log<sub>2</sub>FC = Fold change as expressed as log base 2.

<sup>b</sup> FDR = Adjusted p-value using Benjamini and Hochberg method in DESeq2.

■ **Table S8 Continued Overlapping DGE Data**

Overlapping repressed and induced genes in WT Stress and *Ccnc*<sup>-/-</sup> MEFs, as determined using DESeq2.

| Repressed Genes      | <i>Ccnc</i> <sup>-/-</sup>       |                  | WT Stress           |           | Induced Genes | <i>Ccnc</i> <sup>-/-</sup> |         | WT Stress           |          |
|----------------------|----------------------------------|------------------|---------------------|-----------|---------------|----------------------------|---------|---------------------|----------|
|                      | Log <sub>2</sub> FC <sup>a</sup> | FDR <sup>b</sup> | Log <sub>2</sub> FC | FDR       |               | Log <sub>2</sub> FC        | FDR     | Log <sub>2</sub> FC | FDR      |
| <i>Pdgfra</i>        | -1.42                            | 6.87E-4          | -1.03               | 1.28E-2   | <i>Apobr</i>  | 0.411                      | 4.43E-2 | 1.40                | 1.43E-19 |
| <i>Tmem119</i>       | -1.42                            | 1.13E-62         | -2.63               | 2.30E-150 | <i>Dpp7</i>   | 0.371                      | 4.76E-4 | 1.32                | 3.29E-53 |
| <i>Adra1d</i>        | -1.42                            | 3.49E-4          | -1.22               | 2.96E-3   | <i>Rnf169</i> | 0.314                      | 7.60E-3 | 1.44                | 6.33E-61 |
| <i>Cdc42ep2</i>      | -1.42                            | 1.53E-41         | -1.27               | 2.69E-32  | <i>Pdrg1</i>  | 0.289                      | 4.59E-2 | 1.05                | 9.30E-18 |
| <i>Cemip</i>         | -1.40                            | 8.12E-09         | -1.22               | 4.58E-06  | <i>Phlda3</i> | 0.259                      | 1.18E-3 | 1.60                | 1.32E-85 |
| <i>Epb414b</i>       | -1.39                            | 2.27E-06         | -1.35               | 6.42E-07  |               |                            |         |                     |          |
| <i>Twist2</i>        | -1.38                            | 2.27E-33         | -1.48               | 2.58E-36  |               |                            |         |                     |          |
| <i>Serpinb1a</i>     | -1.38                            | 1.46E-05         | -2.49               | 1.69E-13  |               |                            |         |                     |          |
| <i>Gas1</i>          | -1.36                            | 1.80E-100        | -2.26               | 3.30E-246 |               |                            |         |                     |          |
| <i>Gabrb2</i>        | -1.34                            | 2.08E-3          | -1.18               | 4.75E-3   |               |                            |         |                     |          |
| <i>Snai2</i>         | -1.34                            | 2.21E-30         | -1.40               | 1.16E-33  |               |                            |         |                     |          |
| <i>Wisp2</i>         | -1.33                            | 1.92E-17         | -2.23               | 2.56E-35  |               |                            |         |                     |          |
| <i>Tgfb1</i>         | -1.33                            | 2.97E-11         | -1.96               | 4.35E-21  |               |                            |         |                     |          |
| <i>Medag</i>         | -1.32                            | 2.68E-3          | -1.50               | 2.39E-4   |               |                            |         |                     |          |
| <i>Gpr39</i>         | -1.31                            | 5.72E-07         | -1.17               | 1.60E-06  |               |                            |         |                     |          |
| <i>Arhgef19</i>      | -1.31                            | 1.41E-18         | -1.04               | 1.30E-13  |               |                            |         |                     |          |
| <i>Zfp36l2</i>       | -1.30                            | 1.30E-151        | -1.77               | 6.90E-229 |               |                            |         |                     |          |
| <i>Plxdc2</i>        | -1.29                            | 2.23E-3          | -1.63               | 5.79E-05  |               |                            |         |                     |          |
| <i>Bmf</i>           | -1.28                            | 9.29E-06         | -1.31               | 4.86E-06  |               |                            |         |                     |          |
| <i>Tspan13</i>       | -1.28                            | 3.13E-4          | -1.10               | 2.81E-3   |               |                            |         |                     |          |
| <i>Clmp</i>          | -1.28                            | 1.15E-05         | -2.03               | 4.87E-11  |               |                            |         |                     |          |
| <i>Gdpd5</i>         | -1.26                            | 2.91E-10         | -1.10               | 1.15E-08  |               |                            |         |                     |          |
| <i>Cx3cl1</i>        | -1.26                            | 2.83E-75         | -2.06               | 3.62E-162 |               |                            |         |                     |          |
| <i>Fam20a</i>        | -1.25                            | 1.15E-07         | -1.64               | 2.08E-12  |               |                            |         |                     |          |
| <i>Flt1</i>          | -1.24                            | 2.64E-24         | -1.58               | 1.96E-35  |               |                            |         |                     |          |
| <i>Ldlrad4</i>       | -1.23                            | 4.83E-21         | -1.74               | 1.15E-35  |               |                            |         |                     |          |
| <i>Ccl7</i>          | -1.22                            | 5.22E-30         | -1.30               | 8.87E-34  |               |                            |         |                     |          |
| <i>Gjb5</i>          | -1.22                            | 2.37E-3          | -1.12               | 5.37E-3   |               |                            |         |                     |          |
| <i>Itgb8</i>         | -1.21                            | 1.76E-11         | -1.11               | 1.44E-10  |               |                            |         |                     |          |
| <i>Pdgfb</i>         | -1.16                            | 6.19E-29         | -1.32               | 7.02E-32  |               |                            |         |                     |          |
| <i>Nedd4l</i>        | -1.16                            | 2.88E-05         | -1.33               | 2.70E-06  |               |                            |         |                     |          |
| <i>Hipk2</i>         | -1.15                            | 2.01E-43         | -1.42               | 1.59E-74  |               |                            |         |                     |          |
| <i>Igf1</i>          | -1.10                            | 2.04E-05         | -1.36               | 2.56E-06  |               |                            |         |                     |          |
| <i>Pdp1</i>          | -1.08                            | 1.28E-4          | -1.20               | 4.73E-05  |               |                            |         |                     |          |
| <i>Pik3ip1</i>       | -1.07                            | 2.27E-11         | -1.10               | 2.59E-10  |               |                            |         |                     |          |
| <i>6030445D17Rik</i> | -1.07                            | 1.30E-2          | -1.05               | 1.29E-2   |               |                            |         |                     |          |

<sup>a</sup> Log<sub>2</sub>FC = Fold change as expressed as log base 2.

<sup>b</sup> FDR = Adjusted p-value using Benjamini and Hochberg method in DESeq2.

**Table S8 Continued Overlapping DGE Data**

Overlapping repressed and induced genes in WT Stress and *Ccnc*<sup>-/-</sup> MEFs, as determined using DESeq2.

| Repressed Genes | <i>Ccnc</i> <sup>-/-</sup>       |                  | WT Stress           |           |  |  |  |
|-----------------|----------------------------------|------------------|---------------------|-----------|--|--|--|
|                 | Log <sub>2</sub> FC <sup>a</sup> | FDR <sup>b</sup> | Log <sub>2</sub> FC | FDR       |  |  |  |
| <i>Kitl</i>     | -1.06                            | 4.28E-50         | -1.47               | 3.29E-89  |  |  |  |
| <i>Nr2f2</i>    | -1.06                            | 1.97E-40         | -1.55               | 1.45E-16  |  |  |  |
| <i>Errfi1</i>   | -1.06                            | 1.38E-4          | -1.17               | 7.31E-07  |  |  |  |
| <i>Foxn1</i>    | -1.05                            | 1.77E-2          | -1.00               | 2.01E-283 |  |  |  |
| <i>Lurap1l</i>  | -1.05                            | 4.75E-43         | -1.29               | 3.29E-54  |  |  |  |
| <i>Rad51b</i>   | -1.04                            | 2.11E-2          | -1.05               | 1.50E-2   |  |  |  |
| <i>Tnfrsf1b</i> | -1.01                            | 1.87E-40         | -1.01               | 8.94E-44  |  |  |  |
| <i>Spn</i>      | -1.01                            | 8.25E-05         | -1.64               | 9.66E-10  |  |  |  |
| <i>Apcdd1</i>   | -0.991                           | 6.80E-09         | -1.05               | 1.03E-09  |  |  |  |
| <i>Ccnd1</i>    | -0.986                           | 8.51E-48         | -1.36               | 5.79E-56  |  |  |  |
| <i>Rubcnl</i>   | -0.979                           | 1.81E-2          | -1.59               | 3.42E-05  |  |  |  |
| <i>Ccdc80</i>   | -0.975                           | 1.93E-05         | -1.05               | 5.22E-06  |  |  |  |
| <i>Jup</i>      | -0.975                           | 1.23E-17         | -0.568              | 2.37E-9   |  |  |  |
| <i>Agap1</i>    | -0.950                           | 1.05E-05         | -1.08               | 2.37E-06  |  |  |  |
| <i>Syne3</i>    | -0.949                           | 1.78E-3          | -1.25               | 1.13E-3   |  |  |  |
| <i>Samd12</i>   | -0.924                           | 3.41E-4          | -1.02               | 1.30E-4   |  |  |  |
| <i>Gjb2</i>     | -0.912                           | 2.08E-2          | -1.37               | 3.72E-06  |  |  |  |
| <i>Gas7</i>     | -0.907                           | 2.67E-12         | -1.62               | 2.44E-28  |  |  |  |
| <i>Col8a2</i>   | -0.893                           | 1.60E-3          | -1.31               | 6.85E-06  |  |  |  |
| <i>Trmt61a</i>  | -0.853                           | 3.72E-2          | -1.01               | 1.17E-2   |  |  |  |
| <i>Cyp51</i>    | -0.846                           | 1.20E-121        | -1.41               | 5.80E-206 |  |  |  |
| <i>Ssbp3</i>    | -0.820                           | 1.65E-26         | -1.43               | 1.15E-62  |  |  |  |
| <i>Klhdc8a</i>  | -0.803                           | 2.10E-09         | -1.11               | 6.36E-15  |  |  |  |
| <i>Sned1</i>    | -0.790                           | 7.32E-3          | -2.03               | 9.06E-12  |  |  |  |
| <i>Aacs</i>     | -0.759                           | 7.56E-41         | -1.28               | 1.74E-94  |  |  |  |
| <i>Tsc22d3</i>  | -0.757                           | 1.13E-4          | -1.04               | 9.54E-08  |  |  |  |
| <i>Col1a2</i>   | -0.754                           | 3.19E-72         | -1.39               | 8.70E-304 |  |  |  |
| <i>Igfbp6</i>   | -0.737                           | 4.56E-3          | -1.02               | 8.21E-05  |  |  |  |
| <i>Map6</i>     | -0.709                           | 1.35E-06         | -1.32               | 1.08E-18  |  |  |  |
| <i>Nfil3</i>    | -0.697                           | 6.39E-13         | -1.19               | 2.33E-38  |  |  |  |
| <i>Nsdhl</i>    | -0.696                           | 5.33E-19         | 1.44                | 2.18E-71  |  |  |  |
| <i>Fam171a2</i> | -0.692                           | 4.60E-15         | -1.17               | 2.66E-41  |  |  |  |
| <i>Fhdc1</i>    | -0.688                           | 3.02E-2          | -1.32               | 3.53E-05  |  |  |  |
| <i>Per2</i>     | -0.687                           | 1.40E-3          | -1.49               | 6.38E-11  |  |  |  |
| <i>Gramd2</i>   | -0.681                           | 2.57E-3          | -1.05               | 2.73E-05  |  |  |  |
| <i>Mgst3</i>    | -0.677                           | 2.53E-3          | -1.26               | 1.45E-06  |  |  |  |
| <i>Hoxa13</i>   | -0.673                           | 1.89E-05         | -1.08               | 4.86E-11  |  |  |  |

<sup>a</sup> Log<sub>2</sub>FC = Fold change as expressed as log base 2.

<sup>b</sup> FDR = Adjusted p-value using Benjamini and Hochberg method in DESeq2.

**Table S8 Continued Overlapping DGE Data**

Overlapping repressed and induced genes in WT Stress and *Ccnc*<sup>-/-</sup> MEFs, as determined using DESeq2.

| Repressed Genes | <i>Ccnc</i> <sup>-/-</sup>       |                  | WT Stress           |           |  |  |  |
|-----------------|----------------------------------|------------------|---------------------|-----------|--|--|--|
|                 | Log <sub>2</sub> FC <sup>a</sup> | FDR <sup>b</sup> | Log <sub>2</sub> FC | FDR       |  |  |  |
| <i>Nrn1</i>     | -0.673                           | 6.59E-4          | -1.09               | 1.32E-08  |  |  |  |
| <i>Maml3</i>    | -0.665                           | 3.28E-2          | -1.19               | 1.06E-4   |  |  |  |
| <i>Fam69a</i>   | -0.655                           | 1.68E-4          | -1.03               | 2.72E-10  |  |  |  |
| <i>Tspyl4</i>   | -0.653                           | 6.49E-05         | -1.04               | 2.23E-09  |  |  |  |
| <i>Cxcl1</i>    | -0.646                           | 1.20E-25         | -1.70               | 6.11E-150 |  |  |  |
| <i>Msmo1</i>    | -0.637                           | 1.79E-49         | -1.26               | 4.30E-148 |  |  |  |
| <i>Dhcr24</i>   | -0.617                           | 7.56E-46         | -1.53               | 1.20E-202 |  |  |  |
| <i>Zfp608</i>   | -0.615                           | 4.98E-11         | -2.33               | 4.22E-89  |  |  |  |
| <i>Col6a1</i>   | -0.612                           | 5.45E-20         | -1.22               | 1.66E-52  |  |  |  |
| <i>Adh7</i>     | -0.610                           | 3.19E-14         | -1.14               | 1.51E-41  |  |  |  |
| <i>Bmper</i>    | -0.592                           | 3.16E-2          | -1.10               | 6.66E-05  |  |  |  |
| <i>Plec</i>     | -0.578                           | 1.21E-2          | -1.26               | 2.67E-07  |  |  |  |
| <i>Bhlhe40</i>  | -0.571                           | 5.64E-11         | -1.01               | 7.10E-18  |  |  |  |
| <i>Dhrs9</i>    | -0.569                           | 8.29E-3          | -1.86               | 9.77E-07  |  |  |  |
| <i>Amot</i>     | -0.569                           | 1.44E-12         | -1.30               | 1.88E-51  |  |  |  |
| <i>Eppk1</i>    | -0.562                           | 2.90E-2          | -1.05               | 1.02E-4   |  |  |  |
| <i>Irs1</i>     | -0.560                           | 2.74E-08         | -1.18               | 1.37E-31  |  |  |  |
| <i>Rdh10</i>    | -0.556                           | 1.68E-09         | -1.09               | 1.09E-27  |  |  |  |
| <i>Slc1a3</i>   | -0.551                           | 3.51E-2          | -1.29               | 5.36E-07  |  |  |  |
| <i>Vegfd</i>    | -0.544                           | 9.96E-05         | -1.65               | 5.21E-28  |  |  |  |
| <i>Frmd6</i>    | -0.533                           | 1.64E-18         | -1.14               | 2.95E-84  |  |  |  |
| <i>Tgfb3</i>    | -0.522                           | 2.92E-08         | -1.71               | 1.96E-58  |  |  |  |
| <i>Ankrd35</i>  | -0.517                           | 4.16E-2          | -1.19               | 1.10E-05  |  |  |  |
| <i>Vcam1</i>    | -0.511                           | 1.29E-15         | -1.54               | 1.80E-111 |  |  |  |
| <i>Osbpl3</i>   | -0.510                           | 5.08E-07         | -1.33               | 2.55E-35  |  |  |  |
| <i>Zfp827</i>   | -0.491                           | 8.60E-4          | -1.30               | 3.53E-17  |  |  |  |
| <i>Idi1</i>     | -0.476                           | 4.20E-06         | -1.30               | 4.80E-26  |  |  |  |
| <i>Stard4</i>   | -0.475                           | 1.99E-18         | -1.06               | 3.40E-127 |  |  |  |
| <i>Oaf</i>      | -0.463                           | 1.42E-05         | -1.27               | 6.64E-31  |  |  |  |
| <i>Bpgm</i>     | -0.460                           | 3.04E-08         | -1.29               | 3.10E-46  |  |  |  |
| <i>Prrx2</i>    | -0.445                           | 3.53E-3          | -1.21               | 8.60E-16  |  |  |  |
| <i>Lfng</i>     | -0.426                           | 5.48E-4          | -1.87               | 1.28E-40  |  |  |  |
| <i>Slc22a23</i> | -0.387                           | 9.58E-06         | -1.21               | 2.33E-40  |  |  |  |
| <i>Timp3</i>    | -0.375                           | 3.76E-18         | -1.65               | 2.90E-198 |  |  |  |
| <i>Kif21b</i>   | -0.375                           | 3.01E-3          | -1.58               | 4.74E-31  |  |  |  |
| <i>Bnip3</i>    | -0.371                           | 2.20E-2          | -1.59               | 3.49E-19  |  |  |  |

<sup>a</sup> Log<sub>2</sub>FC = Fold change as expressed as log base 2.

<sup>b</sup> FDR = Adjusted p-value using Benjamini and Hochberg method in DESeq2.

■ **Table S8 Continued Overlapping DGE Data**

Overlapping repressed and induced genes in WT Stress and *Ccnc*<sup>-/-</sup> MEFs, as determined using DESeq2.

| Repressed Genes | <i>Ccnc</i> <sup>-/-</sup>       |                  | WT Stress           |           |  |  |  |
|-----------------|----------------------------------|------------------|---------------------|-----------|--|--|--|
|                 | Log <sub>2</sub> FC <sup>a</sup> | FDR <sup>b</sup> | Log <sub>2</sub> FC | FDR       |  |  |  |
| <i>Cdk6</i>     | -0.367                           | 9.85E-07         | -1.21               | 7.98E-74  |  |  |  |
| <i>Lss</i>      | -0.351                           | 4.96E-11         | -1.19               | 1.37E-94  |  |  |  |
| <i>Nrp1</i>     | -0.348                           | 7.08E-3          | -1.22               | 1.13E-22  |  |  |  |
| <i>Sh3pxd2b</i> | -0.341                           | 1.16E-13         | -1.28               | 2.00E-133 |  |  |  |
| <i>Rnd3</i>     | -0.338                           | 1.37E-06         | -1.33               | 3.86E-61  |  |  |  |
| <i>Fads2</i>    | -0.314                           | 6.84E-05         | -1.26               | 4.99E-49  |  |  |  |
| <i>Sh3bp4</i>   | -0.298                           | 1.83E-06         | -1.32               | 1.32E-80  |  |  |  |
| <i>Trps1</i>    | -0.287                           | 2.23E-3          | -1.72               | 1.79E-59  |  |  |  |
| <i>Gxylt2</i>   | -0.253                           | 4.75E-4          | -1.57               | 1.31E-82  |  |  |  |
| <i>Cnp</i>      | -0.248                           | 1.72E-2          | -1.22               | 1.01E-30  |  |  |  |
| <i>Thbs1</i>    | -0.238                           | 9.75E-06         | -2.34               | 4.30E-274 |  |  |  |
| <i>Slc2a1</i>   | -0.235                           | 8.62E-05         | -1.05               | 7.58E-61  |  |  |  |
| <i>Acat2</i>    | -0.167                           | 3.51E-2          | -1.33               | 4.89E-36  |  |  |  |
| <i>Scd1</i>     | -0.143                           | 1.90E-4          | -1.28               | 1.30E-222 |  |  |  |
| <i>Col5a1</i>   | -0.125                           | 2.33E-2          | -1.07               | 1.64E-73  |  |  |  |

<sup>a</sup> Log<sub>2</sub>FC = Fold change as expressed as log base 2.

<sup>b</sup> FDR = Adjusted p-value using Benjamini and Hochberg method in DESeq2.

■ Table S9 RT-qPCR Primers

| Primer  | Gene           | Strand    | Sequence (5'-3')     |
|---------|----------------|-----------|----------------------|
| KCO2012 | <i>Igfbp4</i>  | Sense     | CCATTCCAAACTGTGACCGC |
| KCO2013 | <i>Igfbp4</i>  | Antisense | CCCTGTCTTCCGATCCACAC |
| KCO2080 | <i>Cd34</i>    | Sense     | GTCTGCTCCCTGCTTCTAGC |
| KCO2081 | <i>Cd34</i>    | Sense     | GGAATAGCTCTGGTGGCTCC |
| KCO2082 | <i>Nfatc4</i>  | Sense     | GCAGAGCAGTGAGGTGACAT |
| KCO2083 | <i>Nfatc4</i>  | Antisense | GGCTCCTCCTTGAAGACCAC |
| KCO2090 | <i>Gpnmb</i>   | Sense     | TGCCTGCTGTCTGTGAGAAG |
| KCO2091 | <i>Gpnmb</i>   | Antisense | CAGCCGATGGAGATCAGGAC |
| KCO2092 | <i>Ltbr</i>    | Sense     | CAGAGAGCTGGAGGCTGAAC |
| KCO2093 | <i>Ltbr</i>    | Antisense | TCAGGAGTGGGGTATGGAGG |
| KCO2094 | <i>Pcolce2</i> | Sense     | CAACTGGCCAGACCGAGATT |
| KCO2095 | <i>Pcolce2</i> | Antisense | GTCATTGACTTCCCCACCGT |
| KCO2106 | <i>Atg9b</i>   | Sense     | GGTTCCTGGCATCACATCCA |
| KCO2107 | <i>Atg9b</i>   | Antisense | CAGCGAAGGAGGAAGGTTGT |
| KCO2108 | <i>Pmaip1</i>  | Sense     | GCCCAGATTGGGGACCTTAG |
| KCO2109 | <i>Pmaip1</i>  | Antisense | TCTTCCTGAGTTGAGCTGCG |
| KCO2110 | <i>F2rl1</i>   | Sense     | GAGTAGGGCTCCGAGTTTCG |
| KCO2111 | <i>F2rl1</i>   | Antisense | CAGTGATTGGAGGCTGGGTT |
| KCO2112 | <i>Tmem119</i> | Sense     | GTCCTTCACCCAGAGCTGTC |
| KCO2113 | <i>Tmem119</i> | Antisense | CCCGGTGAAGAGCTGTCATT |
| KCO2114 | <i>Thbs1</i>   | Sense     | AGTGTCAGTCCAGAACTCG  |
| KCO2115 | <i>Thbs1</i>   | Antisense | TCGCATCTGTTGTTGAGGCT |
| KCO2126 | <i>Sfrp2</i>   | Sense     | AGTTCCTGTGCTCGCTCTTC |
| KCO2127 | <i>Sfrp2</i>   | Antisense | CCTTGGGAGCTTCCTCTGTG |
| KCO2148 | <i>Gabarap</i> | Sense     | GAAAAAGCCCCCAAAGCTCG |
| KCO2149 | <i>Gabarap</i> | Antisense | CACTGGTGGGTGGAATGAC  |
| KCO2161 | <i>Gtf2h1</i>  | Sense     | GAAGCAGGATGGAGCACTGT |
| KCO2162 | <i>Gtf2h1</i>  | Antisense | CCTTCACTGCATCCCCTTCT |
