# Supplementary material
Source: publisher figshare collection journal article supplement (https://gsajournals.figshare.com/articles/dataset/_/8048756)
Supplement: Supplementary file 2 [file 1]

■ **Table S5 *Ccnc*<sup>-/-</sup> DGE Data**Top 50 repressed and induced genes in *Ccnc*<sup>-/-</sup> MEFs, using DESeq2.

| Repressed Genes      | Log <sub>2</sub> FC <sup>a</sup> | FDR <sup>b</sup> | Induced Genes   | Log <sub>2</sub> FC | FDR       |
|----------------------|----------------------------------|------------------|-----------------|---------------------|-----------|
| <i>Cxcl5</i>         | -8.85                            | 1.46E-292        | <i>Pitx1</i>    | 7.90                | 3.49E-175 |
| <i>Efemp1</i>        | -7.89                            | 1.65E-191        | <i>Sall1</i>    | 7.60                | 1.74E-168 |
| <i>Sox2</i>          | -6.92                            | 1.20E-112        | <i>Acta2</i>    | 6.45                | 1.20E-298 |
| <i>Grem1</i>         | -6.89                            | 7.74E-115        | <i>Scara3</i>   | 6.41                | 4.81E-92  |
| <i>Vldlr</i>         | -6.87                            | 7.67E-111        | <i>Galm</i>     | 5.96                | 2.37E-105 |
| <i>Pcdh17</i>        | -6.60                            | 6.38E-130        | <i>Sim2</i>     | 5.80                | 4.78E-70  |
| <i>Tbx5</i>          | -6.53                            | 7.24E-86         | <i>Pcolce2</i>  | 5.80                | 5.40E-122 |
| <i>Ston2</i>         | -6.19                            | 2.10E-122        | <i>Ltbr</i>     | 5.75                | 2.78E-226 |
| <i>Igfbp4</i>        | -5.90                            | 1.67E-96         | <i>Hoxb4</i>    | 5.73                | 1.68E-75  |
| <i>Penk</i>          | -5.82                            | 9.01E-92         | <i>Sox11</i>    | 5.14                | 1.89E-185 |
| <i>Igfbp3</i>        | -5.80                            | 5.10E-148        | <i>Mmp2</i>     | 5.05                | 1.75E-84  |
| <i>Foxg1</i>         | -5.74                            | 2.55E-67         | <i>Meox2</i>    | 4.98                | 2.38E-46  |
| <i>Sfrp2</i>         | -5.66                            | 1.14E-188        | <i>Hoxc13</i>   | 4.92                | 3.53E-45  |
| <i>Ackr3</i>         | -5.24                            | 1.75E-140        | <i>Peg12</i>    | 4.92                | 1.78E-48  |
| <i>Slc16a2</i>       | -5.17                            | 8.83E-260        | <i>Hoxb13</i>   | 4.91                | 9.55E-48  |
| <i>Acot1</i>         | -5.05                            | 7.24E-48         | <i>Trim71</i>   | 4.87                | 8.26E-83  |
| <i>Pik3r5</i>        | -5.00                            | 1.30E-297        | <i>Plekha2</i>  | 4.86                | 6.54E-45  |
| <i>Slc22a4</i>       | -4.73                            | 9.73E-42         | <i>Nid2</i>     | 4.84                | 1.54E-221 |
| <i>Nfatc4</i>        | -4.64                            | 7.78E-95         | <i>Boc</i>      | 4.70                | 7.25E-52  |
| <i>Arap2</i>         | -4.63                            | 1.30E-55         | <i>Six2</i>     | 4.68                | 6.07E-41  |
| <i>Klf12</i>         | -4.62                            | 8.09E-38         | <i>Bicc1</i>    | 4.62                | 1.31E-229 |
| <i>4930452B06Rik</i> | -4.59                            | 3.51E-37         | <i>Trim30a</i>  | 4.42                | 2.28E-39  |
| <i>Mab21l1</i>       | -4.53                            | 6.94E-52         | <i>Myl9</i>     | 4.39                | 1.02E-68  |
| <i>S1pr3</i>         | -4.53                            | 2.00E-173        | <i>Ifnlr1</i>   | 4.38                | 1.47E-42  |
| <i>Pappa</i>         | -4.43                            | 5.93E-42         | <i>Rsad2</i>    | 4.38                | 1.73E-45  |
| <i>Zic2</i>          | -4.37                            | 2.07E-93         | <i>Gpnmb</i>    | 4.30                | 1.20E-299 |
| <i>Sp9</i>           | -4.20                            | 2.51E-43         | <i>Lgals3bp</i> | 4.19                | 6.48E-190 |
| <i>Kcnj2</i>         | -4.15                            | 3.25E-192        | <i>Flt4</i>     | 4.18                | 1.33E-48  |
| <i>Cd34</i>          | -4.14                            | 1.35E-29         | <i>Slc2a10</i>  | 4.15                | 3.68E-29  |
| <i>Nid1</i>          | -4.14                            | 1.00E-298        | <i>Gsdmd</i>    | 4.14                | 1.68E-31  |
| <i>Fgf5</i>          | -4.14                            | 6.29E-28         | <i>Paqr9</i>    | 4.05                | 3.95E-29  |
| <i>Osr1</i>          | -4.09                            | 1.30E-296        | <i>Cplx2</i>    | 4.00                | 1.88E-138 |
| <i>Lonrf3</i>        | -4.00                            | 8.01E-28         | <i>Fam217b</i>  | 3.92                | 8.64E-41  |
| <i>Sema4f</i>        | -4.00                            | 3.50E-32         | <i>Lifr</i>     | 3.89                | 4.71E-130 |
| <i>Zic5</i>          | -3.96                            | 1.38E-40         | <i>Mrgpre</i>   | 3.89                | 1.26E-56  |
| <i>Gnai1</i>         | -3.90                            | 2.79E-32         | <i>Evx2</i>     | 3.86                | 1.35E-36  |
| <i>Enpp2</i>         | -3.86                            | 2.95E-49         | <i>Armcx4</i>   | 3.79                | 4.54E-142 |
| <i>Pcdhgb5</i>       | -3.85                            | 1.95E-39         | <i>Flrt2</i>    | 3.78                | 1.32E-108 |

<sup>a</sup> Log<sub>2</sub>FC = Fold change as expressed as log base 2.<sup>b</sup> FDR = Adjusted p-value using Benjamini and Hochberg method in DESeq2.

■ **Table S5 Continued *Ccnc*<sup>-/-</sup> DGE Data**

Top 50 repressed and induced genes in *Ccnc*<sup>-/-</sup> MEFs, using DESeq2.

| Repressed Genes | Log <sub>2</sub> FC <sup>a</sup> | FDR <sup>b</sup> | Induced Genes        | Log <sub>2</sub> FC | FDR      |
|-----------------|----------------------------------|------------------|----------------------|---------------------|----------|
| <i>Fam110c</i>  | -3.85                            | 8.29E-24         | <i>P4ha3</i>         | 3.77                | 6.02E-34 |
| <i>Gm43517</i>  | -3.80                            | 2.77E-23         | <i>Msx1</i>          | 3.77                | 4.40E-65 |
| <i>Tubb3</i>    | -3.76                            | 1.30E-55         | <i>2310030G06Rik</i> | 3.75                | 3.53E-24 |
| <i>Bmp6</i>     | -3.73                            | 1.61E-23         | <i>Lmcd1</i>         | 3.75                | 4.84E-26 |
| <i>Itgbl1</i>   | -3.72                            | 1.63E-35         | <i>Selp</i>          | 3.74                | 1.12E-22 |
| <i>Fgf7</i>     | -3.66                            | 1.12E-40         | <i>Asxl2</i>         | 3.73                | 5.33E-36 |
| <i>Ar</i>       | -3.62                            | 8.35E-22         | <i>Sgcd</i>          | 3.73                | 5.34E-23 |
| <i>Dlx3</i>     | -3.61                            | 3.52E-24         | <i>Esr1</i>          | 3.72                | 1.04E-24 |
| <i>Slit3</i>    | -3.60                            | 2.41E-21         | <i>Ulbp1</i>         | 3.65                | 2.45E-68 |
| <i>Prelp</i>    | -3.55                            | 1.39E-28         | <i>Oas1a</i>         | 3.59                | 6.96E-26 |
| <i>Zdhhc15</i>  | -3.53                            | 9.39E-66         | <i>Hoxb7</i>         | 3.59                | 1.38E-20 |
| <i>Pkp1</i>     | -3.48                            | 2.28E-49         | <i>Hoxb7</i>         | 3.59                | 1.60E-43 |

<sup>a</sup> Log<sub>2</sub>FC = Fold change as expressed as log base 2.

<sup>b</sup> FDR = Adjusted p-value using Benjamini and Hochberg method in DESeq2.
