# Supplementary material
Source: publisher figshare collection journal article supplement (https://gsajournals.figshare.com/articles/dataset/_/8048756)
Supplement: Supplementary file 3 [file 1]

**Table S3 Oxidative Stress-Repressed Genes in WT MEFs**

GO-Functional Annotation Clusters for repressed genes in WT MEFs following oxidative stress. The following clusters (1-4) resulting from DAVID-GO Functional Annotation Clustering, represent the genes repressed (1,966 genes).

| Cluster | ES <sup>a</sup> | Category <sup>b</sup> | Associated Terms                                | p-value  | Number of Genes Involved |
|---------|-----------------|-----------------------|-------------------------------------------------|----------|--------------------------|
| 1       | 12.41           | GOTERM MF DIRECT      | Cadherin binding involved in cell-cell adhesion | 8.73E-17 | 76                       |
|         |                 | GOTERM CC DIRECT      | Cell-cell adherens junction                     | 3.83E-15 | 78                       |
|         |                 | GOTERM BP DIRECT      | Cell-cell adhesion                              | 1.80E-7  | 43                       |
| 2       | 6.88            | GOTERM MF DIRECT      | Transferase Activity                            | 5.38E-9  | 210                      |
|         |                 | GOTERM BP DIRECT      | Protein phosphorylation                         | 1.28E-8  | 99                       |
|         |                 | GOTERM MF DIRECT      | ATP binding                                     | 1.42E-8  | 212                      |
|         |                 | GOTERM BP DIRECT      | Phosphorylation                                 | 1.93E-8  | 103                      |
|         |                 | GOTERM MF DIRECT      | Kinase activity                                 | 3.07E-8  | 111                      |
| 3       | 6.84            | UP KEYWORDS           | Cell cycle                                      | 4.25E-10 | 102                      |
|         |                 | UP KEYWORDS           | Cell division                                   | 1.93E-9  | 69                       |
|         |                 | GOTERM BP DIRECT      | Cell cycle                                      | 1.64E-7  | 100                      |
|         |                 | GOTERM BP DIRECT      | Cell division                                   | 1.81E-7  | 69                       |
|         |                 | UP KEYWORDS           | Mitosis                                         | 9.54E-6  | 45                       |
|         |                 | GOTERM MF DIRECT      | Mitotic nuclear division                        | 4.06E-5  | 49                       |
| 4       | 5.90            | UP KEYWORDS           | Oxidoreductase                                  | 1.69E-7  | 95                       |
|         |                 | GOTERM BP DIRECT      | Oxidation-reduction process                     | 2.55E-6  | 100                      |
|         |                 | GOTERM MF DIRECT      | Oxidoreductase activity                         | 4.73E-6  | 94                       |

<sup>a</sup> ES = Enrichment score produced by Functional Annotation Clustering in DAVID.

<sup>b</sup> Category Terms Defined: GOTERM MF DIRECT = GO Term for Direct Involvement in Molecular Function; GOTERM CC DIRECT = GO Term for Direct Localization to Cellular Compartment; GOTERM BP DIRECT = GO Term for Direct Involvement in Biological Process; UP Keywords = Uniprot Keywords
