# Supplementary material
Source: publisher figshare collection journal article supplement (https://gsajournals.figshare.com/articles/dataset/_/8048756)
Supplement: Supplementary file 4 [file 1]

■ **Table S2 WT Stress DGE Data**

Top 50 repressed and induced genes in WT Stress MEFs, using DESeq2.

| Repressed Genes       | Log <sub>2</sub> FC <sup>a</sup> | FDR <sup>b</sup> | Induced Genes    | Log <sub>2</sub> FC | FDR       |
|-----------------------|----------------------------------|------------------|------------------|---------------------|-----------|
| <i>Col3a1</i>         | -3.08                            | 1.55E-27         | <i>Inka2</i>     | 3.80                | 1.34E-69  |
| <i>F2rl1</i>          | -2.86                            | 3.24E-49         | <i>Ovgp1</i>     | 3.73                | 3.09E-38  |
| <i>Prelp</i>          | -2.69                            | 1.43E-17         | <i>Btnl9</i>     | 3.54                | 1.88E-23  |
| <i>Tmem119</i>        | -2.63                            | 2.29E-150        | <i>Evpl</i>      | 3.47                | 1.39E-24  |
| <i>Angptl4</i>        | -2.62                            | 8.35E-94         | <i>Zfp750</i>    | 3.31                | 1.54E-23  |
| <i>Cmklr1</i>         | -2.53                            | 5.05E-16         | <i>Sec14l5</i>   | 3.15                | 7.42E-18  |
| <i>Serpib1a</i>       | -2.49                            | 1.69E-13         | <i>Trp53inp1</i> | 3.15                | 7.42E-18  |
| <i>Thbs1</i>          | -2.34                            | 4.25E-274        | <i>Ddit4l</i>    | 3.03                | 6.19E-48  |
| <i>Zfp608</i>         | -2.33                            | 4.22E-89         | <i>Efcab8</i>    | 2.98                | 3.26E-24  |
| <i>Gas1</i>           | -2.26                            | 3.29E-246        | <i>Cyp27b1</i>   | 2.87                | 8.81E-16  |
| <i>Wisp2</i>          | -2.23                            | 2.56E-35         | <i>Gpr152</i>    | 2.87                | 5.92E-15  |
| <i>Apln</i>           | -2.20                            | 1.31E-55         | <i>Atg9b</i>     | 2.86                | 9.84E-37  |
| <i>Angptl7</i>        | -2.16                            | 3.10E-14         | <i>Slc23a3</i>   | 2.70                | 9.64E-13  |
| <i>Gper1</i>          | -2.11                            | 7.06E-11         | <i>Pmaip1</i>    | 2.64                | 3.25E-23  |
| <i>Cd248</i>          | -2.10                            | 1.39E-209        | <i>Gm29106</i>   | 2.60                | 6.52E-16  |
| <i>9930111J21Rik2</i> | -2.10                            | 2.11E-10         | <i>Rprm</i>      | 2.59                | 2.21E-13  |
| <i>Soon2</i>          | -2.08                            | 1.07E-10         | <i>Grin3b</i>    | 2.58                | 1.27E-37  |
| <i>Emilin</i>         | -2.06                            | 7.29E-108        | <i>Slc16a8</i>   | 2.55                | 6.06E-15  |
| <i>Styk1</i>          | -2.06                            | 5.42E-17         | <i>Tcam1</i>     | 2.53                | 7.65E-20  |
| <i>Cx3cl1</i>         | -2.06                            | 2.00E-162        | <i>Fscn2</i>     | 2.52                | 7.82E-14  |
| <i>Mme</i>            | -2.05                            | 4.97E-29         | <i>Il17f</i>     | 2.46                | 8.77E-11  |
| <i>Lipg</i>           | -2.04                            | 1.73E-49         | <i>Hic1</i>      | 2.45                | 1.07E-14  |
| <i>Clmp</i>           | -2.03                            | 4.87E-11         | <i>Alpk3</i>     | 2.42                | 3.64E-10  |
| <i>Sned1</i>          | -2.03                            | 9.06E-12         | <i>Sptbn2</i>    | 2.41                | 2.21E-28  |
| <i>Plxna2</i>         | -2.03                            | 7.24E-132        | <i>Gas2l1</i>    | 2.34                | 3.22E-15  |
| <i>Ptgfr</i>          | -2.01                            | 6.66E-9          | <i>Olfra461</i>  | 2.37                | 3.45E-9   |
| <i>Tgfb1</i>          | -1.96                            | 4.35E-21         | <i>H2-DMa</i>    | 2.31                | 1.33E-14  |
| <i>Bmp2</i>           | -1.95                            | 1.63E-70         | <i>Rsph10b</i>   | 2.30                | 1.70E-9   |
| <i>Scd2</i>           | -1.95                            | 1.10E-299        | <i>Slc7a3</i>    | 2.30                | 3.71E-9   |
| <i>Dchs2</i>          | -1.95                            | 9.60E-25         | <i>Mmp15</i>     | 2.26                | 3.93E-14  |
| <i>S1pr3</i>          | -1.94                            | 4.43E-53         | <i>Chrn2</i>     | 2.24                | 3.52E-15  |
| <i>Cdh3</i>           | -1.89                            | 2.06E-30         | <i>Ermap</i>     | 2.24                | 1.27E-8   |
| <i>Itgbl1</i>         | -1.89                            | 2.30E-14         | <i>Creb3l3</i>   | 2.24                | 1.22E-9   |
| <i>Lfng</i>           | -1.87                            | 1.28E-40         | <i>Sapcd1</i>    | 2.22                | 1.15E-8   |
| <i>Angpt1</i>         | -1.87                            | 3.62E-9          | <i>Wfikkn1</i>   | 2.21                | 4.13E-19  |
| <i>Dhrs1</i>          | -1.86                            | 9.77E-7          | <i>Sesn2</i>     | 2.20                | 2.40E-203 |
| <i>Wisp1</i>          | -1.86                            | 1.97E-111        | <i>Fam186a</i>   | 2.18                | 2.71E-8   |
| <i>Elovl6</i>         | -1.86                            | 1.14E-214        | <i>Kcnj4</i>     | 2.17                | 4.08E-17  |

<sup>a</sup> Log<sub>2</sub>FC = Fold change as expressed as log base 2.<sup>b</sup> FDR = Adjusted p-value using Benjamini and Hochberg method in DESeq2.

■ **Table S2 Continued WT Stress DGE Data**

Top 50 repressed and induced genes in WT Stress MEFs, using DESeq2.

| Repressed Genes | Log <sub>2</sub> FC <sup>a</sup> | FDR <sup>b</sup> | Induced Genes  | Log <sub>2</sub> FC | FDR      |
|-----------------|----------------------------------|------------------|----------------|---------------------|----------|
| <i>Pcdh19</i>   | -1.85                            | 3.99E-45         | <i>Arhgef6</i> | 2.16                | 2.53E-8  |
| <i>Ntn4</i>     | -1.84                            | 9.42E-29         | <i>Rbm3</i>    | 2.14                | 1.45E-26 |
| <i>Ngnf</i>     | -1.84                            | 5.99E-15         | <i>Dpx1</i>    | 2.13                | 3.25E-23 |
| <i>Gm14137</i>  | -1.82                            | 3.20E-48         | <i>Mdm2</i>    | 2.12                | 4.61E-8  |
| <i>Plat</i>     | -1.81                            | 1.93E-28         | <i>Tex52</i>   | 2.10                | 1.15E-7  |
| <i>Setbp1</i>   | -1.81                            | 2.07E-24         | <i>Slc26a8</i> | 2.09                | 3.41E-8  |
| <i>Fat4</i>     | -1.81                            | 1.69E-86         | <i>Gng3</i>    | 2.09                | 2.40E-20 |
| <i>Pappa</i>    | -1.79                            | 1.70E-14         | <i>Aen</i>     | 2.07                | 3.51E-39 |
| <i>Adamts5</i>  | -1.79                            | 6.99E-76         | <i>Rho</i>     | 2.02                | 3.28E-7  |
| <i>Ephb6</i>    | -1.78                            | 4.78E-41         | <i>Gzmm</i>    | 2.02                | 2.99E-9  |
| <i>Zfp36l2</i>  | -1.77                            | 6.90E-229        | <i>Pmm1</i>    | 2.02                | 6.67E-8  |

<sup>a</sup> Log<sub>2</sub>FC = Fold change as expressed as log base 2.

<sup>b</sup> FDR = Adjusted p-value using Benjamini and Hochberg method in DESeq2.
