# Supplementary material
Source: publisher figshare collection journal article supplement (https://gsajournals.figshare.com/articles/dataset/_/8048756)
Supplement: Supplementary file 5 [file 1]

**Table S6 Cyclin C-Dependent Genes**

GO-Functional Annotation Clusters for repressed genes in *Ccnc*<sup>-/-</sup> MEFs. The following clusters (1-4) resulting from DAVID-GO Functional Annotation Clustering, represent the genes repressed (2,353 genes).

| Cluster | ES <sup>a</sup> | Category <sup>b</sup> | Associated Terms                                | p-value  | Number of Genes Involved |
|---------|-----------------|-----------------------|-------------------------------------------------|----------|--------------------------|
| 1       | 19.06           | UP KEYWORDS           | Mitochondrion                                   | 1.52E-26 | 222                      |
|         |                 | GOTERM CC DIRECT      | Mitochondrion                                   | 1.68E-25 | 327                      |
|         |                 | UP KEYWORDS           | Transit peptide                                 | 4.91E-19 | 121                      |
| 2       | 6.78            | UP KEYWORDS           | Oxidoreductase                                  | 8.07E-8  | 109                      |
|         |                 | GOTERM BP DIRECT      | Oxidation-reduction process                     | 1.91E-7  | 121                      |
|         |                 | GOTERM MF DIRECT      | Oxidoreductase activity                         | 3.16E-7  | 110                      |
| 3       | 4.49            | GOTERM MF DIRECT      | Cadherin binding involved in cell-cell adhesion | 2.44E-6  | 59                       |
|         |                 | GOTERM CC DIRECT      | Cell-cell adherens junction                     | 2.67E-5  | 60                       |
|         |                 | GOTERM BP DIRECT      | Cell-cell adhesion                              | 5.11E-4  | 38                       |
| 4       | 3.23            | UP KEYWORDS           | Cell cycle                                      | 3.32E-7  | 105                      |
|         |                 | GOTERM BP DIRECT      | Cell cycle                                      | 1.76E-5  | 104                      |
|         |                 | UP KEYWORDS           | Cell division                                   | 1.85E-3  | 57                       |
|         |                 | GOTERM BP DIRECT      | Cell division                                   | 1.02E-2  | 58                       |
|         |                 | GOTERM BP DIRECT      | Mitotic nuclear division                        | 1.73E-2  | 44                       |
|         |                 | UP KEYWORDS           | Mitosis                                         | 2.16E-2  | 38                       |

<sup>a</sup> ES = Enrichment score produced by Functional Annotation Clustering in DAVID.

<sup>b</sup> Category Terms Defined: UP Keywords = Uniprot Keywords; GOTERM CC DIRECT = GO Term for Direct Localization to Cellular Compartment; GOTERM BP DIRECT = GO Term for Direct Involvement in Biological Process;; GOTERM MF DIRECT = GO Term for Direct Involvement in Molecular Function
