# Supplementary material
Source: publisher figshare collection journal article supplement (https://gsajournals.figshare.com/articles/dataset/_/8048756)
Supplement: Supplementary file 6 [file 1]

■ Table S9 RT-qPCR Primers

| Primer  | Gene           | Strand    | Sequence (5'-3')     |
|---------|----------------|-----------|----------------------|
| KCO2012 | <i>Igfbp4</i>  | Sense     | CCATTCCAAACTGTGACCGC |
| KCO2013 | <i>Igfbp4</i>  | Antisense | CCCTGTCTTCCGATCCACAC |
| KCO2080 | <i>Cd34</i>    | Sense     | GTCTGCTCCCTGCTTCTAGC |
| KCO2081 | <i>Cd34</i>    | Sense     | GGAATAGCTCTGGTGGCTCC |
| KCO2082 | <i>Nfatc4</i>  | Sense     | GCAGAGCAGTGAGGTGACAT |
| KCO2083 | <i>Nfatc4</i>  | Antisense | GGCTCCTCCTTGAAGACCAC |
| KCO2090 | <i>Gpnmb</i>   | Sense     | TGCCTGCTGTCTGTGAGAAG |
| KCO2091 | <i>Gpnmb</i>   | Antisense | CAGCCGATGGAGATCAGGAC |
| KCO2092 | <i>Ltbr</i>    | Sense     | CAGAGAGCTGGAGGCTGAAC |
| KCO2093 | <i>Ltbr</i>    | Antisense | TCAGGAGTGGGGTATGGAGG |
| KCO2094 | <i>Pcolce2</i> | Sense     | CAACTGGCCAGACCGAGATT |
| KCO2095 | <i>Pcolce2</i> | Antisense | GTCATTGACTTCCCCACCGT |
| KCO2106 | <i>Atg9b</i>   | Sense     | GGTTCCTGGCATCACATCCA |
| KCO2107 | <i>Atg9b</i>   | Antisense | CAGCGAAGGAGGAAGGTTGT |
| KCO2108 | <i>Pmaip1</i>  | Sense     | GCCCAGATTGGGGACCTTAG |
| KCO2109 | <i>Pmaip1</i>  | Antisense | TCTTCCTGAGTTGAGCTGCG |
| KCO2110 | <i>F2rl1</i>   | Sense     | GAGTAGGGCTCCGAGTTTCG |
| KCO2111 | <i>F2rl1</i>   | Antisense | CAGTGATTGGAGGCTGGGTT |
| KCO2112 | <i>Tmem119</i> | Sense     | GTCCTTCACCCAGAGCTGTC |
| KCO2113 | <i>Tmem119</i> | Antisense | CCCGGTGAAGAGCTGTCATT |
| KCO2114 | <i>Thbs1</i>   | Sense     | AGTGTCAGTCCAGAACTCG  |
| KCO2115 | <i>Thbs1</i>   | Antisense | TCGCATCTGTTGTTGAGGCT |
| KCO2126 | <i>Sfrp2</i>   | Sense     | AGTTCCTGTGCTCGCTCTTC |
| KCO2127 | <i>Sfrp2</i>   | Antisense | CCTTGGGAGCTTCCTCTGTG |
| KCO2148 | <i>Gabarap</i> | Sense     | GAAAAAGCCCCCAAAGCTCG |
| KCO2149 | <i>Gabarap</i> | Antisense | CACTGGTGGGTGGAATGAC  |
| KCO2161 | <i>Gtf2h1</i>  | Sense     | GAAGCAGGATGGAGCACTGT |
| KCO2162 | <i>Gtf2h1</i>  | Antisense | CCTTCACTGCATCCCCTTCT |
