# Supplementary material
Source: publisher figshare collection journal article supplement (https://gsajournals.figshare.com/articles/dataset/_/8048756)
Supplement: Supplementary file 7 [file 1]

**Table S4 Oxidative Stress-Induced Genes in WT MEFs**

GO-Functional Annotation Clusters for induced genes in WT MEFs following oxidative stress. The following clusters (1-4) resulting from DAVID-GO Functional Annotation Clustering, represent the genes induced (1,875 genes).

| Cluster | ES <sup>a</sup> | Category <sup>b</sup> | Associated Terms                         | p-value | Number of Genes Involved |
|---------|-----------------|-----------------------|------------------------------------------|---------|--------------------------|
| 1       | 6.38            | GOTERM BP DIRECT      | Cellular response to DNA damage stimulus | 1.86E-8 | 72                       |
|         |                 | UP KEYWORDS           | DNA damage                               | 6.44E-8 | 58                       |
|         |                 | GOTERM BP DIRECT      | DNA repair                               | 1.82E-6 | 54                       |
|         |                 | UP KEYWORDS           | DNA repair                               | 1.36E-5 | 45                       |
| 2       | 4.93            | UP KEYWORDS           | Ubl conjugation pathway                  | 4.44E-9 | 95                       |
|         |                 | GOTERM BP DIRECT      | Protein ubiquitination                   | 4.68E-6 | 58                       |
|         |                 | GOTERM MF DIRECT      | Ubiquitin-protein transferase activity   | 1.50E-4 | 49                       |
|         |                 | GOTERM MF DIRECT      | Ubiquitin protein ligase activity        | 6.26E-3 | 29                       |
| 3       | 4.15            | GOTERM BP DIRECT      | Autophagy                                | 8.16E-6 | 30                       |
|         |                 | GOTERM CC DIRECT      | Autophagosome                            | 2.05E-4 | 16                       |
|         |                 | GOTERM BP DIRECT      | Autophagosome assembly                   | 3.38E-3 | 11                       |
| 4       | 3.46            | UP KEYWORDS           | Protein Transport                        | 4.47E-6 | 79                       |
|         |                 | GOTERM BP DIRECT      | Protein transport                        | 4.43E-5 | 80                       |
|         |                 | UP KEYWORDS           | Transport                                | 4.55E-3 | 185                      |
|         |                 | GOTERM BP DIRECT      | Transport                                | 1.55E-2 | 182                      |

<sup>a</sup> ES = Enrichment score produced by Functional Annotation Clustering in DAVID.

<sup>b</sup> Category Terms Defined: GOTERM BP DIRECT = GO Term for Direct Involvement in Biological Process; UP Keywords = Uniprot Keywords; GOTERM MF DIRECT = GO Term for Direct Involvement in Molecular Function; GOTERM CC DIRECT = GO Term for Direct Localization to Cellular Compartment
