# Supplementary material
Source: publisher figshare collection journal article supplement (https://gsajournals.figshare.com/articles/dataset/_/8048756)
Supplement: Supplementary file 9 [file 1]

**Table S7 Cyclin C-Repressed Genes**

GO-Functional Annotation Clusters for induced genes in *Ccnc*<sup>-/-</sup> MEFs. The following clusters (1-4) resulting from DAVID-GO Functional Annotation Clustering, represent the genes induced (2,482 genes).

| Cluster | ES <sup>a</sup> | Category <sup>b</sup> | Associated Terms                       | p-value  | Number of Genes Involved |
|---------|-----------------|-----------------------|----------------------------------------|----------|--------------------------|
| 1       | 8.39            | UP KEYWORDS           | Lysosome                               | 3.03E-11 | 65                       |
|         |                 | GOTERM CC DIRECT      | Lysosomal membrane                     | 1.80E-8  | 59                       |
|         |                 | GOTERM CC DIRECT      | Lysosome                               | 1.23E-7  | 73                       |
| 2       | 6.68            | UP KEYWORDS           | Ubl conjugation pathway                | 3.14E-12 | 128                      |
|         |                 | GOTERM MF DIRECT      | Ubiquitin-protein transferase activity | 2.27E-6  | 70                       |
|         |                 | GOTERM BP DIRECT      | Protein ubiquitination                 | 3.31E-6  | 75                       |
|         |                 | GOTERM MF DIRECT      | Ligase activity                        | 8.38E-5  | 70                       |
| 3       | 6.56            | UP KEYWORDS           | Protein transport                      | 1.35E-10 | 115                      |
|         |                 | GOTERM BP DIRECT      | Protein transport                      | 5.34E-9  | 121                      |
|         |                 | UP KEYWORDS           | Transport                              | 9.79E-6  | 265                      |
|         |                 | GOTERM BP DIRECT      | Transport                              | 8.34E-4  | 264                      |
| 4       | 3.51            | KEGG PATHWAY          | Melanogenesis                          | 3.80E-6  | 29                       |
|         |                 | GOTERM BP DIRECT      | Canonical Wnt signaling pathway        | 2.80E-4  | 24                       |
|         |                 | KEGG PATHWAY          | Wnt signaling pathway                  | 1.22E-3  | 30                       |
|         |                 | KEGG PATHWAY          | Basal cell carcinoma                   | 6.99E-3  | 14                       |

<sup>a</sup> ES = Enrichment score produced by Functional Annotation Clustering in DAVID.

<sup>b</sup> Category Terms Defined: UP Keywords = Uniprot Keywords; GOTERM CC DIRECT = GO Term for Direct Localization to Cellular Compartment; GOTERM MF DIRECT = GO Term for Direct Involvement in Molecular Function; GOTERM BP DIRECT = GO Term for Direct Involvement in Biological Process; KEGG PATHWAY = KEGG Pathway Association
