# Supplementary material
Source: publisher figshare collection journal article supplement (https://gsajournals.figshare.com/articles/dataset/_/8048756)
Supplement: Supplementary file 10 [file 1]

### ■ Table S1 Mapping Statistics

Statistics for sample mapping to the mouse genome, using Bowtie2.

| Statistics                | WT     |        |        | WT Stress |        |        | <i>Ccnc</i> <sup>-/-</sup> |        |        |
|---------------------------|--------|--------|--------|-----------|--------|--------|----------------------------|--------|--------|
|                           | 1      | 2      | 3      | 1         | 2      | 3      | 1                          | 2      | 3      |
| Total Paired Reads Mapped | 2.18E7 | 2.29E7 | 2.31E7 | 2.41E7    | 2.62E7 | 1.89E7 | 2.35E7                     | 2.44E7 | 2.37E7 |
| Alignment Rate (%)        | 81.2   | 78.8   | 84.0   | 78.8      | 85.0   | 80.1   | 80.7                       | 83.4   | 79.6   |
